# Supplementary material
Source: PubMed Central journal article supplement (PMC5612110)
Supplement: 10.1074_M117.796516_jbc.M117.796516-1.pdf [file 10.1074_M117.796516_jbc.M117.796516-1.pdf]

The “drug” transporter OAT3 regulates endogenous metabolite flow through the gut-liver-kidney axis

**Kevin T. Bush, Wei Wu, Christina Lun, Sanjay K. Nigam**

**SUPPLEMENTAL TABLE 1**  
**Metabolites Increased in Plasma of *Oat3KO* Mice**

| Pathway                                          | Biochemical Name                                     | Fold Change       | p-value | q-value | KEGG                   | HMDB                      |
|--------------------------------------------------|------------------------------------------------------|-------------------|---------|---------|------------------------|---------------------------|
| Aminosugar Metabolism                            | Glucuronate                                          | 1.49              | 0.0195  | 0.0810  | <a href="#">C00191</a> | <a href="#">HMDB00127</a> |
| Benzoate Metabolism                              | catechol sulfate                                     | 3.92              | 0.0023  | 0.0233  | <a href="#">C00090</a> | <a href="#">HMDB59724</a> |
|                                                  | O-methylcatechol sulfate                             | 5.67              | 0.0163  | 0.0733  |                        |                           |
|                                                  | 4-vinylphenol sulfate                                | 5.34              | 0.0180  | 0.0777  | <a href="#">C05627</a> | <a href="#">HMDB04072</a> |
|                                                  | p-hydroxybenzaldehyde                                | 3.43              | 0.0612  | 0.1593  | <a href="#">C00633</a> | <a href="#">HMDB11718</a> |
| Carnitine Metabolism                             | deoxycarnitine                                       | 1.46              | 0.0295  | 0.1042  | <a href="#">C01181</a> | <a href="#">HMDB01161</a> |
| Chemical                                         | 2-aminophenol sulfate                                | 3.21              | 0.0082  | 0.0461  |                        | <a href="#">HMDB61116</a> |
|                                                  | 6-hydroxyindole sulfate                              | 6.08              | 0.0003  | 0.0083  |                        |                           |
| Drug                                             | Salicylate                                           | 7.21              | 0.0045  | 0.0322  | <a href="#">C00805</a> | <a href="#">HMDB01895</a> |
|                                                  | hydroquinone sulfate                                 | 2.63              | 0.0555  | 0.1557  | <a href="#">C00530</a> | <a href="#">HMDB02434</a> |
| Fatty Acid, Dicarboxylate                        | sebacate (decanedioate)                              | 1.90              | 0.0166  | 0.0737  | <a href="#">C08277</a> | <a href="#">HMDB00792</a> |
|                                                  | tetradecanedioate                                    | 2.05              | 0.0037  | 0.0289  |                        | <a href="#">HMDB00872</a> |
|                                                  | azelate (nonanedioate)                               | 1.71              | 0.0754  | 0.1803  | <a href="#">C08261</a> | <a href="#">HMDB00784</a> |
|                                                  | 3-carboxy-4-methyl-5-propyl-2-furanpropanoate (CMPF) | 2.58              | 0.0829  | 0.1915  |                        | <a href="#">HMDB61112</a> |
| Fatty Acid, Monohydroxy                          | 2-hydroxydecanoate                                   | 2.06              | 0.0143  | 0.0665  |                        |                           |
|                                                  | 3-hydroxyhexanoate                                   | 2.12              | 0.0127  | 0.0610  |                        |                           |
| Food Component                                   | 2-hydroxyoctanoate                                   | 2.82              | 0.0606  | 0.1593  |                        | <a href="#">HMDB02264</a> |
|                                                  | 2-oxindole-3-acetate                                 | 3.94              | 0.0028  | 0.0253  |                        |                           |
|                                                  | equol glucuronide                                    | 42.32             | 0.0000  | 0.0000  |                        |                           |
|                                                  | equol sulfate                                        | 7.81              | 0.0000  | 0.0000  |                        |                           |
|                                                  | homostachydrine*                                     | 1.97              | 0.0233  | 0.0891  | <a href="#">C08283</a> | <a href="#">HMDB33433</a> |
|                                                  | indoleacrylate                                       | 4.82              | 0.0062  | 0.0395  |                        | <a href="#">HMDB00734</a> |
|                                                  | indolin-2-one                                        | 8.81              | 0.0040  | 0.0302  | <a href="#">C12312</a> |                           |
|                                                  | Stachydrine                                          | 1.86              | 0.0360  | 0.1182  | <a href="#">C10172</a> | <a href="#">HMDB04827</a> |
|                                                  | 4-allylphenol sulfate                                | 6.26              | 0.0262  | 0.0959  |                        |                           |
|                                                  | Pyraline                                             | 1.60              | 0.0942  | 0.2029  |                        |                           |
|                                                  | N-acetylpyraline                                     | 2.08              | 0.0967  | 0.2055  |                        |                           |
|                                                  | daidzein sulfate (1)                                 | 5.99              | 0.0683  | 0.1712  |                        |                           |
|                                                  | Fructose, Mannose and Galactose Metabolism           | mannitol/sorbitol | 1.74    | 0.0473  | 0.1461                 | <a href="#">C01507</a>    |
| Galactonate                                      |                                                      | 1.62              | 0.0621  | 0.1605  | <a href="#">C00880</a> | <a href="#">HMDB00565</a> |
| Glutathione Metabolism                           | S-methylglutathione                                  | 2.30              | 0.0585  | 0.1575  | <a href="#">C11347</a> |                           |
| Glycine, Serine and Threonine Metabolism         | O-acetylhomoserine                                   | 3.06              | 0.0501  | 0.1501  | <a href="#">C01077</a> |                           |
| Histidine Metabolism                             | imidazole propionate                                 | 4.46              | 0.0070  | 0.0419  |                        | <a href="#">HMDB02271</a> |
|                                                  | 1-methylimidazoleacetate                             | 1.54              | 0.0188  | 0.0795  | <a href="#">C05828</a> | <a href="#">HMDB02820</a> |
| Long Chain Fatty Acid                            | myristate (14:0)                                     | 1.78              | 0.0573  | 0.1575  | <a href="#">C06424</a> | <a href="#">HMDB00806</a> |
| Lysoplasmalogen                                  | 1-(1-enyl-oleoyl)-2-linoleoyl-GPE (P-18:1/18:2)*     | 3.64              | 0.0522  | 0.1536  |                        |                           |
| Medium Chain Fatty Acid                          | caproate (6:0)                                       | 1.46              | 0.0939  | 0.2029  | <a href="#">C01585</a> | <a href="#">HMDB00535</a> |
| Methionine, Cysteine, SAM and Taurine Metabolism | Hypotaurine                                          | 3.19              | 0.0413  | 0.1325  | <a href="#">C00519</a> | <a href="#">HMDB00965</a> |
|                                                  | methionine sulfone                                   | 2.21              | 0.0676  | 0.1704  |                        |                           |
|                                                  | cysteine s-sulfate                                   | 1.97              | 0.0548  | 0.1551  | <a href="#">C05824</a> | <a href="#">HMDB00731</a> |
| Mevalonate Metabolism                            | Mevalonate                                           | 1.67              | 0.0188  | 0.0795  | <a href="#">C02104</a> | <a href="#">HMDB00227</a> |
| Nicotinate and Nicotinamide Metabolism           | trigonelline (N'-methylnicotinate)                   | 1.86              | 0.0351  | 0.1161  | <a href="#">C01004</a> | <a href="#">HMDB00875</a> |
| Pentose Metabolism                               | sedoheptulose                                        | 1.73              | 0.0529  | 0.1536  |                        | <a href="#">HMDB03219</a> |
|                                                  | phenyllactate (PLA)                                  | 3.20              | 0.0000  | 0.0019  | <a href="#">C05607</a> | <a href="#">HMDB00779</a> |
| Phenylalanine and Tyrosine Metabolism            | phenol sulfate                                       | 2.84              | 0.0035  | 0.0289  | <a href="#">C02180</a> | <a href="#">HMDB60015</a> |
|                                                  | p-cresol sulfate                                     | 3.83              | 0.0154  | 0.0700  | <a href="#">C01468</a> | <a href="#">HMDB11635</a> |
|                                                  | Gentisate                                            | 5.99              | 0.0009  | 0.0128  | <a href="#">C00628</a> | <a href="#">HMDB00152</a> |
|                                                  | 3-(3-hydroxyphenyl)propionate sulfate                | 8.03              | 0.0068  | 0.0414  |                        |                           |
|                                                  | p-cresol-glucuronide*                                | 3.72              | 0.0198  | 0.0810  |                        | <a href="#">HMDB11686</a> |
|                                                  | 3-(3-hydroxyphenyl)propionate                        | 4.08              | 0.0839  | 0.1927  | <a href="#">C11457</a> | <a href="#">HMDB00375</a> |
|                                                  | 2-hydroxyphenylacetate                               | 2.98              | 0.0505  | 0.1503  | <a href="#">C05852</a> | <a href="#">HMDB00669</a> |
|                                                  | 4-hydroxycinnamate sulfate                           | 3.13              | 0.0752  | 0.1803  |                        |                           |
| Phospholipid Metabolism                          | trimethylamine N-oxide                               | 4.54              | 0.0002  | 0.0080  | <a href="#">C01104</a> | <a href="#">HMDB00925</a> |
| Polypeptide                                      | bradykinin, des-arg(9)                               | 3.26              | 0.0809  | 0.1880  | <a href="#">C00306</a> | <a href="#">HMDB04246</a> |
| Polyunsaturated Fatty Acid (n3 and n6)           | docosapentaenoate (n6 DPA; 22:5n6)                   | 1.38              | 0.0794  | 0.1865  | <a href="#">C16513</a> | <a href="#">HMDB01976</a> |
| Bile Acid Metabolism                             | Cholate                                              | 158.95            | 0.0018  | 0.0202  | <a href="#">C00695</a> | <a href="#">HMDB00619</a> |
|                                                  | beta-muricholate                                     | 24.87             | 0.0037  | 0.0289  | <a href="#">C17726</a> | <a href="#">HMDB00415</a> |
|                                                  | deoxycholate                                         | 8.59              | 0.0255  | 0.0959  | <a href="#">C04483</a> | <a href="#">HMDB00626</a> |
|                                                  | ursodeoxycholate                                     | 14.60             | 0.0086  | 0.0466  | <a href="#">C07880</a> | <a href="#">HMDB00946</a> |
|                                                  | 7-ketodeoxycholate                                   | 39.10             | 0.0091  | 0.0482  |                        | <a href="#">HMDB00391</a> |
|                                                  | Hyocholate                                           | 3.50              | 0.0694  | 0.1725  | <a href="#">C17649</a> | <a href="#">HMDB00760</a> |
| Purine Metabolism, Guanine containing            | 7-methylguanine                                      | 1.51              | 0.0701  | 0.1725  | <a href="#">C02242</a> | <a href="#">HMDB00897</a> |
| Pyrimidine Metabolism, Uracil containing         | 5,6-dihydrouracil                                    | 1.87              | 0.0969  | 0.2055  | <a href="#">C00429</a> | <a href="#">HMDB00076</a> |
| Sterol                                           | 4-cholesten-3-one                                    | 1.62              | 0.0922  | 0.2027  | <a href="#">C00599</a> | <a href="#">HMDB00921</a> |
| TCA Cycle                                        | succinylcarnitine (C4-DC)                            | 4.44              | 0.0332  | 0.1124  |                        |                           |
| Tryptophan Metabolism                            | N-acetyltryptophan                                   | 2.74              | 0.0175  | 0.0764  | <a href="#">C03137</a> | <a href="#">HMDB13713</a> |
|                                                  | indolelactate                                        | 4.63              | 0.0000  | 0.0000  | <a href="#">C02043</a> | <a href="#">HMDB00671</a> |
|                                                  | indoleacetate                                        | 2.80              | 0.0088  | 0.0475  | <a href="#">C00954</a> | <a href="#">HMDB00197</a> |
|                                                  | 3-indoxyl sulfate                                    | 3.83              | 0.0008  | 0.0128  |                        | <a href="#">HMDB00682</a> |
|                                                  | Serotonin                                            | 1.52              | 0.0065  | 0.0405  | <a href="#">C00780</a> | <a href="#">HMDB00259</a> |
|                                                  | indole-3-carboxylic acid                             | 2.85              | 0.0060  | 0.0390  | <a href="#">C19837</a> | <a href="#">HMDB03320</a> |
|                                                  | N-acetylkynurenine (2)                               | 3.05              | 0.0196  | 0.0810  |                        |                           |
|                                                  | Picolinate                                           | 1.98              | 0.0903  | 0.2005  | <a href="#">C10164</a> | <a href="#">HMDB02243</a> |
|                                                  | 5-hydroxyindoleacetate                               | 1.61              | 0.0947  | 0.2029  | <a href="#">C05635</a> | <a href="#">HMDB00763</a> |
|                                                  | indoleacetylglutamine                                | 2.03              | 0.0575  | 0.1575  |                        |                           |
| Urea cycle; Arginine and Proline Metabolism      | Citrulline                                           | 1.28              | 0.0413  | 0.1325  | <a href="#">C00327</a> | <a href="#">HMDB00904</a> |
|                                                  | N-delta-acetylornithine                              | 1.58              | 0.0486  | 0.1468  |                        |                           |
|                                                  | N2,N5-diacetylornithine                              | 1.75              | 0.0538  | 0.1546  |                        |                           |
| Vitamin B6 Metabolism                            | Pyridoxal                                            | 2.41              | 0.0330  | 0.1124  | <a href="#">C00250</a> | <a href="#">HMDB01545</a> |
|                                                  | Pyridoxate                                           | 1.92              | 0.0381  | 0.1240  | <a href="#">C00847</a> | <a href="#">HMDB00017</a> |

| <b>SUPPLEMENTAL TABLE 2</b>                                                                                                                                 |                                                          |                                                                |                                  |
|-------------------------------------------------------------------------------------------------------------------------------------------------------------|----------------------------------------------------------|----------------------------------------------------------------|----------------------------------|
| <b>Re-Clusterization of Cluster II In Vivo OAT3 Knockout Metabolites Together with Metabolites For Which In Vitro Data Exists for Interaction with OAT3</b> |                                                          |                                                                |                                  |
| <b>Biochemical Name</b>                                                                                                                                     | <b>Significantly Increased in Serum of <i>Oat3KO</i></b> | <b>Existence of In Vitro Support for Interaction with OAT3</b> | <b>In Vitro Reference (PMID)</b> |
| Cholate                                                                                                                                                     | ✓ <sup>a</sup>                                           | ✓                                                              | 18480179                         |
| beta-muricholate                                                                                                                                            | ✓ <sup>a</sup>                                           |                                                                |                                  |
| deoxycholate                                                                                                                                                | ✓ <sup>a</sup>                                           | ✓                                                              | 18480179                         |
| ursodeoxycholate                                                                                                                                            | ✓ <sup>a</sup>                                           |                                                                |                                  |
| 7-ketodeoxycholate                                                                                                                                          | ✓ <sup>a</sup>                                           |                                                                |                                  |
| chenodeoxycholate                                                                                                                                           |                                                          | ✓                                                              | 18480179                         |
| glycocholate                                                                                                                                                |                                                          | ✓                                                              | 18480179                         |
| glycochenodeoxycholate                                                                                                                                      |                                                          | ✓                                                              | 18480179                         |
| Taurochenodeoxycholate                                                                                                                                      |                                                          | ✓                                                              | 18480179                         |
| Taurocholate                                                                                                                                                |                                                          | ✓                                                              | 11408557                         |
| Prostaglandin F2a                                                                                                                                           |                                                          | ✓                                                              | 11907186                         |
| Prostaglandin E2                                                                                                                                            |                                                          | ✓                                                              | 11907186                         |
| Androsterone sulfate                                                                                                                                        |                                                          | ✓                                                              | 18508962                         |
| Dehydroepiandrosterone sulfate                                                                                                                              | ✓ <sup>b</sup>                                           | ✓                                                              | 17255469                         |
| Progesterone                                                                                                                                                |                                                          | ✓                                                              | 18508962                         |
| Cortisol                                                                                                                                                    |                                                          | ✓                                                              | 15864504                         |
| Aldosterone                                                                                                                                                 |                                                          | ✓                                                              | 18508962                         |
| Deoxycorticosterone                                                                                                                                         |                                                          | ✓                                                              | 18508962                         |
| Corticosterone                                                                                                                                              |                                                          | ✓                                                              | 18508962                         |

<sup>a</sup>Data from this study; <sup>b</sup>Delayed efflux from brain of *Oat3KO* (PMID: 21325432)

| <b>Supplemental Table 3</b>                                                                                                                                                                                                                                                             |                                        |             |                         |
|-----------------------------------------------------------------------------------------------------------------------------------------------------------------------------------------------------------------------------------------------------------------------------------------|----------------------------------------|-------------|-------------------------|
| <b>Transporter Preference of Endogenous Metabolites For Which Interaction Data (Km, Ki, IC50) Exists</b>                                                                                                                                                                                |                                        |             |                         |
| <b>Metabolite</b>                                                                                                                                                                                                                                                                       | <b>Ratio OAT1/OAT3* In Vitro Assay</b> |             | <b>Preference</b>       |
|                                                                                                                                                                                                                                                                                         | <b>Ratio</b>                           | <b>PMID</b> |                         |
| Indoleacetate                                                                                                                                                                                                                                                                           | 0.04                                   | 14675047    | OAT1 Preference         |
| 3-Methoxy-4-hydroxymandelate                                                                                                                                                                                                                                                            | 0.06                                   | 14737013    |                         |
| Glutarate                                                                                                                                                                                                                                                                               | 0.04                                   | 21865262    |                         |
| Homovanillate                                                                                                                                                                                                                                                                           | 0.09                                   | 14737013    |                         |
| Indoxyl sulfate                                                                                                                                                                                                                                                                         | 0.07                                   | 14675047    |                         |
| 5-Hydroxyindoleacetate                                                                                                                                                                                                                                                                  | 0.12                                   | 14737013    |                         |
| 5-Methoxyindoleacetate                                                                                                                                                                                                                                                                  | 0.42                                   | 14737013    |                         |
| 2-nonenal                                                                                                                                                                                                                                                                               | 0.32                                   | 27467266    |                         |
| Phenylacetic acid                                                                                                                                                                                                                                                                       | 0.42                                   | 27467266    |                         |
| 3,4-Dihydroxymandelate                                                                                                                                                                                                                                                                  | 0.44                                   | 14737013    |                         |
| Prostaglandin F2alpha                                                                                                                                                                                                                                                                   | 0.52                                   | 11907186    | No or Slight Preference |
| 3,4-Dihydroxyphenylacetate                                                                                                                                                                                                                                                              | 0.57                                   | 14737013    |                         |
| 4-decenal                                                                                                                                                                                                                                                                               | 0.72                                   | 27467266    |                         |
| Hippurate                                                                                                                                                                                                                                                                               | 0.61                                   | 14675047    |                         |
| N-Acetylserotonin                                                                                                                                                                                                                                                                       | 0.90                                   | 14737013    |                         |
| p-cresol sulfate                                                                                                                                                                                                                                                                        | 1.05                                   | 27467266    |                         |
| 5-Methoxytryptamine                                                                                                                                                                                                                                                                     | 1.70                                   | 14737013    | OAT3 Preference         |
| Prostaglandin E2                                                                                                                                                                                                                                                                        | 2.81                                   | 11907186    |                         |
| 3-Carboxy-4-methyl-5propyl-2-furanpropionate                                                                                                                                                                                                                                            | 5.32                                   | 14675047    |                         |
| Urate                                                                                                                                                                                                                                                                                   | 3.28                                   | 27467266    |                         |
| 5-Methoxytryptophol                                                                                                                                                                                                                                                                     | 3.30                                   | 14737013    |                         |
| Taurocholate                                                                                                                                                                                                                                                                            | 3.51                                   | 11408557    |                         |
| 4-Hydroxy-2-quinolinecarboxylic acid                                                                                                                                                                                                                                                    | 4.25                                   | 15944205    |                         |
| Melatonin                                                                                                                                                                                                                                                                               | 18.2                                   | 14675047    |                         |
| *In the case of some metabolites, multiple values (e.g., Km, Ki, IC50) are found in different publications. Here, only those values for which in vitro assays were described in the same paper were chosen for comparison. Thus, the experiments were performed in the same laboratory. |                                        |             |                         |

**Supplemental Table 4**  
**List of OAT1 and OAT3 in vivo Endogenous Metabolites from This and Previous Studies**

|                         | <b>Metabolite</b>                     | <b>PMID</b>                | <b>Metabolite</b>                  | <b>PMID</b>          |
|-------------------------|---------------------------------------|----------------------------|------------------------------------|----------------------|
|                         | <b>Oat1</b>                           | 2-hydroxy-3-methylvalerate | 16354673                           | indole lactic acid   |
| 2-hydroxyisovalerate    |                                       | 16354673                   | indoxyl sulfate                    | 21476605             |
| 2-oxo-3-methylvalerate  |                                       | 16354673                   | kynurenine                         | 21476605             |
| 3-hydroxybutyrate       |                                       | 16354673                   | methionine                         | 21476605             |
| 3-hydroxyisobutyrate    |                                       | 16354673                   | N2-N2-dimethyl guanosine           | 21476605             |
| 3-hydroxypropionate     |                                       | 16354673                   | n-acetylaspartate                  | 16354673             |
| 3-hydroxyvalerate       |                                       | 16354673                   | n-acetylglycine                    | 21476605             |
| 3-methylcrotonylglycine |                                       | 16354673                   | orotate                            | 16354673             |
| 4-hydroxyphenylacetate  |                                       | 16354673                   | pantothenic acid                   | 21476605             |
| 4-hydroxyphenyllactate  |                                       | 16354673                   | phenyl sulfate                     | 21476605             |
| 4-hydroxyphenylpyruvate |                                       | 16354673                   | phenylacetyl glycine               | 21476605             |
| 4-pyridoxic acid        |                                       | 21476605                   | propionylglycine                   | 16354673             |
| a-ketoglutarate         |                                       | 16354673                   | thymidine                          | 21476605             |
| Benzoate                |                                       | 16354673                   | uracil                             | 16354673             |
| Creatinine              |                                       | 22338083                   | urate                              | 18270321<br>21476605 |
| hexanoylglycine         |                                       | 16354673                   | xanthurenic acid                   | 21476605             |
| <b>Oat3</b>             |                                       | <b>Metabolite</b>          | <b>PMID</b>                        | <b>Metabolite</b>    |
|                         | 1-methylguanosine                     | 23920220                   | Glucuronate                        | This study           |
|                         | 1-methylimidazoleacetate              | This study                 | Homostachydrine                    | This study           |
|                         | 2-aminophenol sulfate                 | This study                 | Hypotaurine                        | This study           |
|                         | 2-hydroxydecanoate                    | This study                 | Imidazole propionate               | This study           |
|                         | 2-oxindole-3-acetate                  | This study                 | Indole-3-carboxylic acid           | This study           |
|                         | 2-oxo-9-methylthionoanoic acid        | 23920220                   | Indoleacetate                      | This study           |
|                         | 3-(3-hydroxyphenyl)propionate sulfate | This study                 | Indoleacrylate                     | This study           |
|                         | 3-hydroxyhexanoate                    | This study                 | Indolelactate                      | This study           |
|                         | 3-indoxyl sulfate                     | This study                 | indolin-2-one                      | This study           |
|                         | 4-allylphenol sulfate                 | This study                 | Licuroside                         | 23920220             |
|                         | 4-hydroxyphenylacetate                | 23920220                   | mannitol/sorbitol                  | This study           |
|                         | 4-vinylphenol sulfate                 | This study                 | Mevalonate                         | This study           |
|                         | 7-hydroxyfluphenazine                 | 23920220                   | N-acetyltryptophan                 | This study           |
|                         | 7-ketodeoxycholate                    | This study                 | N-delta-acetylornithine            | This study           |
|                         | 7-methylguanosine                     | 23920220                   | O-methylcatechol sulfate           | This study           |
|                         | 9-amino-nonanoic acid                 | 23920220                   | p-cresol sulfate                   | This study           |
|                         | 9-O-acetylneuraminic acid             | 23920220                   | p-cresol-glucuronide               | This study           |
|                         | beta-muricholate                      | This study                 | Phenol sulfate                     | This study           |
|                         | Catechol sulfate                      | This study                 | Phenyllactate (PLA)                | This study           |
|                         | Cholate                               | This study                 | pongamoside A                      | 23920220             |
|                         | Citrate                               | 23920220                   | Pyridoxal                          | This study           |
|                         | Citrulline                            | This study                 | Pyridoxate                         | This study           |
|                         | Creatinine                            | 22338083                   | Salicylate                         | This study           |
|                         | Dehydroascorbic acid                  | 23920220                   | Sebacate (decanedioate)            | This study           |
|                         | Dehydroepiandrosterone sulfate        | 21325432                   | Serotonin                          | This study           |
|                         | Deoxycarnitine                        | This study                 | Stachydrine                        | This study           |
|                         | Deoxycholate                          | This study                 | succinylcarnitine (C4-DC)          | This study           |
|                         | Epicatechin 3-O-(3-O-methylgallate)   | 23920220                   | Tetradecanedioate                  | This study           |
|                         | Equol glucuronide                     | This study                 | Thymidine                          | 18508962             |
|                         | Equol sulfate                         | This study                 | trigonelline (N'-methylnicotinate) | This study           |
|                         | Estrone sulfate                       | 21325432<br>This study     | Trimethylamine N-oxide             | This study           |
| Flavin mononucleotide   | 18508962                              | Urate                      | 18270321                           |                      |
| Gentisate               | This study                            | Ursodeoxycholate           | This study                         |                      |
